# Supplementary material for: Novel self-assembled metal-phenolic nanoplatforms for triple-negative breast cancer treatment: photothermal-chemotherapy/ferroptosis synergy inducing immunogenic cell death
Source: Royal Society of Chemistry journal article supplement (doi:10.1039/d5ra03962b), 2025-01-01
Supplement: d5ra03962b1.pdf [file d5ra03962b1.pdf]

1 **Novel Self-Assembled Metal-Phenolic Nanoplatfoms for Triple-**  
2 **Negative Breast Cancer Treatment: Photothermal-**  
3 **Chemotherapy/Ferroptosis Synergy Inducing Immunogenic Cell**  
4 **Death**

5 *Bohao Peng<sup>1, ‡</sup>, Ruoyao Wang<sup>1, ‡</sup>, Tian Li<sup>1</sup>, Xiaoqing Yu<sup>1</sup>, Zhiyu Wang<sup>1</sup>, Xiyang*  
6 *Zhang<sup>1</sup>, Yuanfeng Tan<sup>1</sup>, Long Cheng<sup>2,3\*</sup> and Lu Yang<sup>1\*</sup>*

7 <sup>1</sup>Department of Breast and Thyroid Surgery, The Second Affiliated Hospital of  
8 Chongqing Medical University, Chongqing 400010, P. R. China

9 <sup>2</sup>Ultrasound Department of the Second Affiliated Hospital, The Second Affiliated  
10 Hospital of Chongqing Medical University, Chongqing 400010, P. R. China

11 <sup>3</sup>Chongqing Key Laboratory of Ultrasound Molecular Imaging and Therapy, The  
12 Second Affiliated Hospital of Chongqing Medical University, Chongqing 400010, P.  
13 R. China

14 <sup>‡</sup>These authors contributed equally.

15 **Corresponding Authors**

16 \* Lu Yang

17 Department of Breast and Thyroid Surgery, The Second Affiliated Hospital of  
18 Chongqing Medical University, Chongqing 400010, P. R. China

19 Email:302118@cqmu.edu.cn

20 \* Long Cheng

21 Ultrasound Department of the Second Affiliated Hospital, The Second Affiliated

22 Hospital of Chongqing Medical University, Chongqing 400010, P. R. China

23 Chongqing Key Laboratory of Ultrasound Molecular Imaging and Therapy, The

24 Second Affiliated Hospital of Chongqing Medical University, Chongqing 400010, P.

25 R. China

26 Email: 304188@hospital.cqmu.edu.cn

27

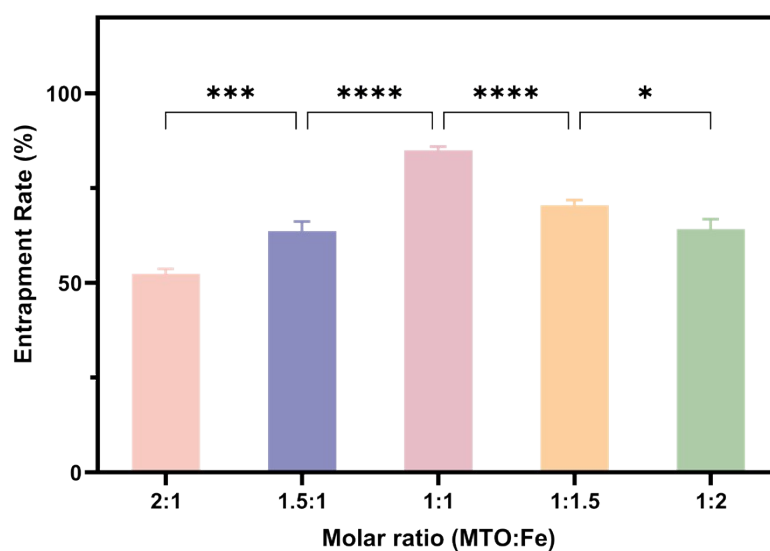

28

29 **Figure S1.** Entrapment Rate of MFTA in different molar ratio.

30

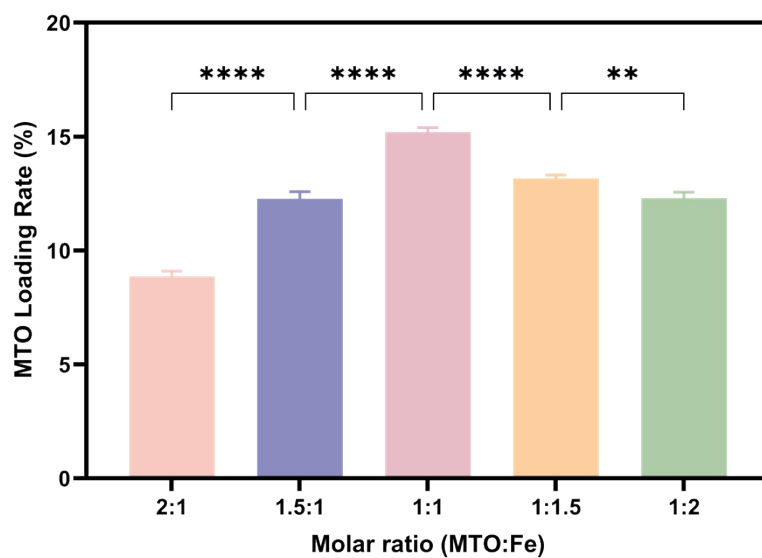

31

32 **Figure S2.** MTO loading rate of MFTA in different molar ratio.

33

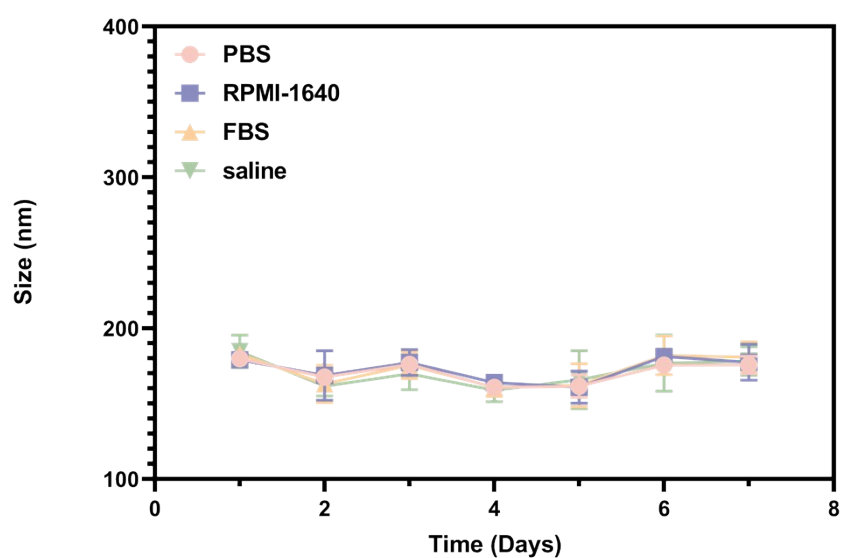

34

35 **Figure S3.** Diameters in 7 days.

36

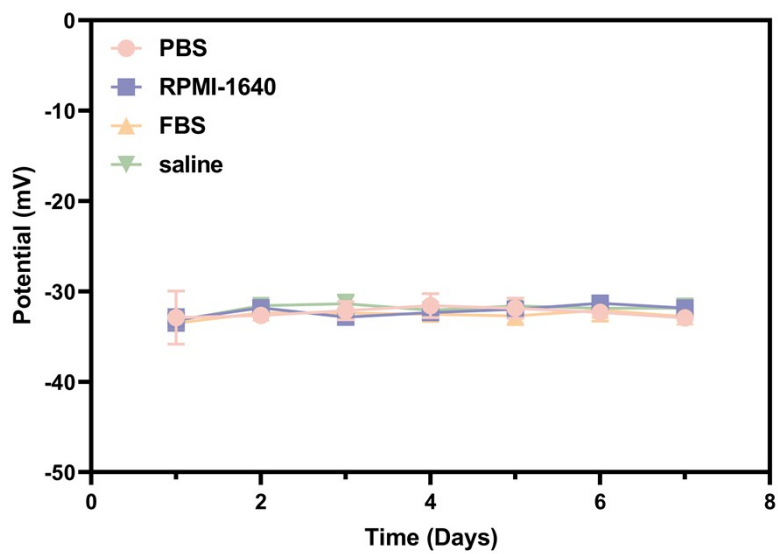

37

38 **Figure S4.** Zeta potential in 7 days.

39

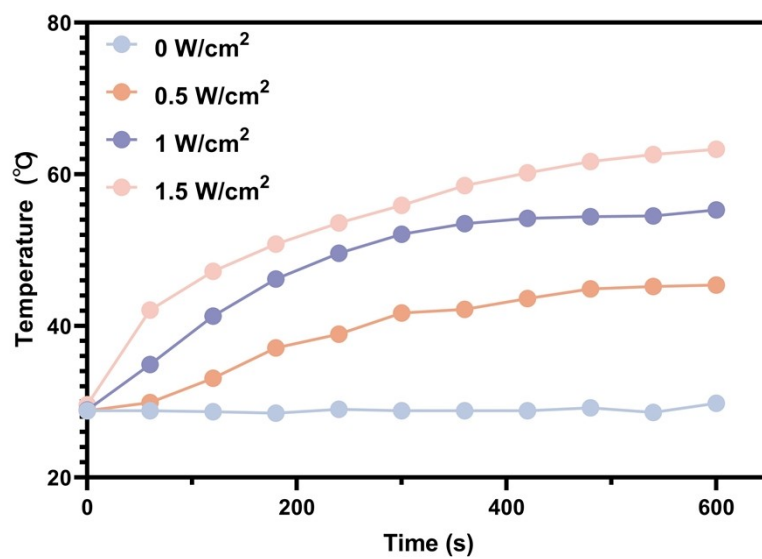

40

41 **Figure S5.** The temperature elevation curve of MFTA irradiated by 808 nm NIR with  
 42 different power densities.

43

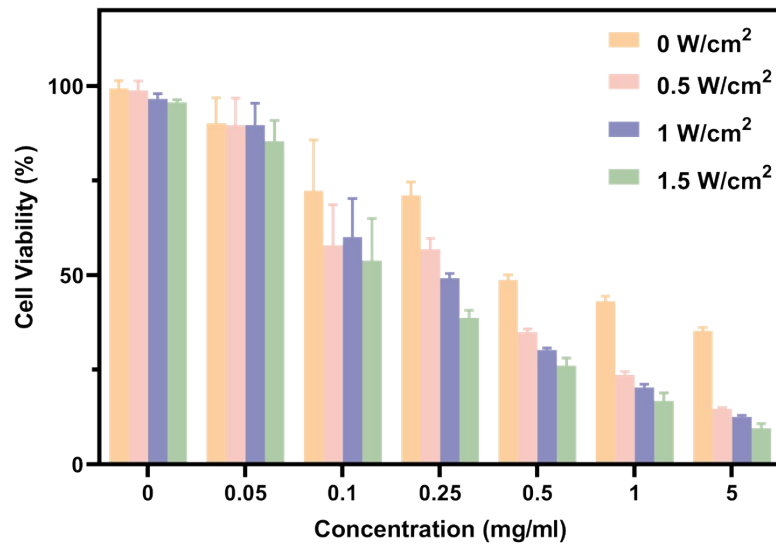

44

45 **Figure S6.** CCK-8 test of 4T1 cells treated with MFTA and 808 nm NIR with  
 46 different power densities.

47

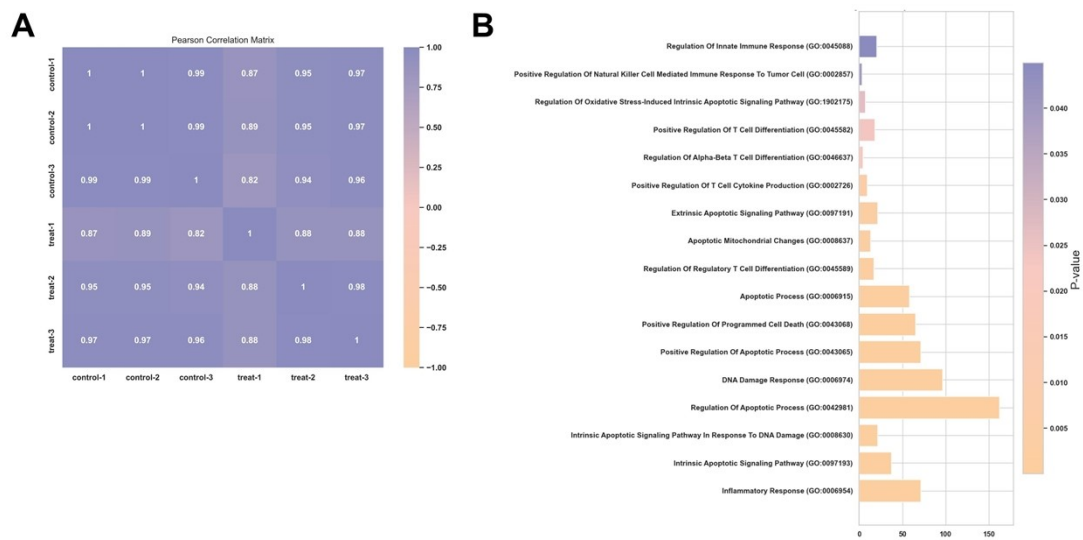

48

49 **Figure S7.** Transcriptome analysis. (A) Spearman correlation analysis of all samples.  
 50 (B) GO enrichment analysis.

51

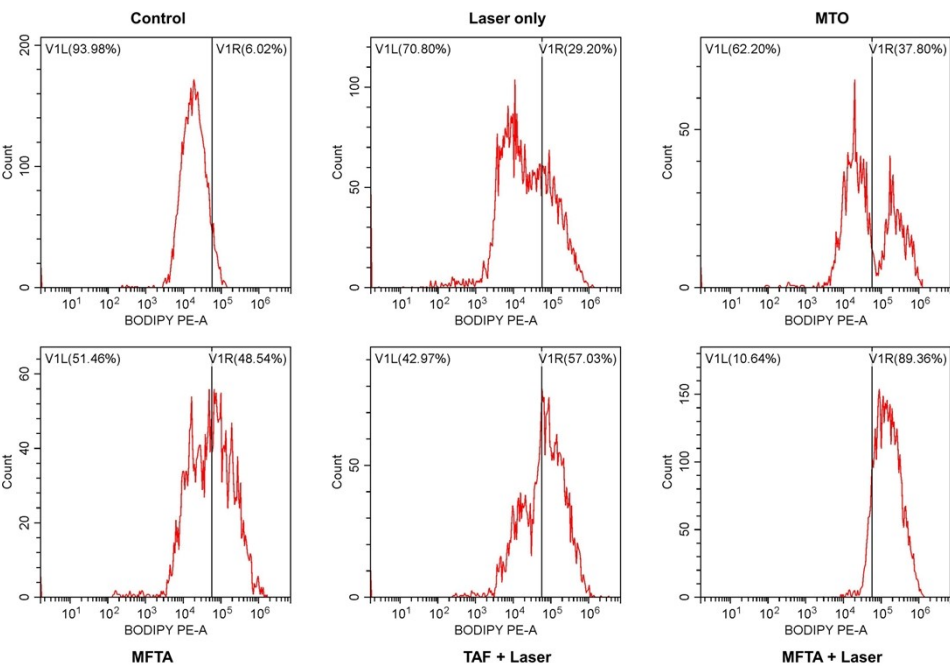

52

53 **Figure S8.** FCM analysis of LPO in 4T1 cells after various treatments.

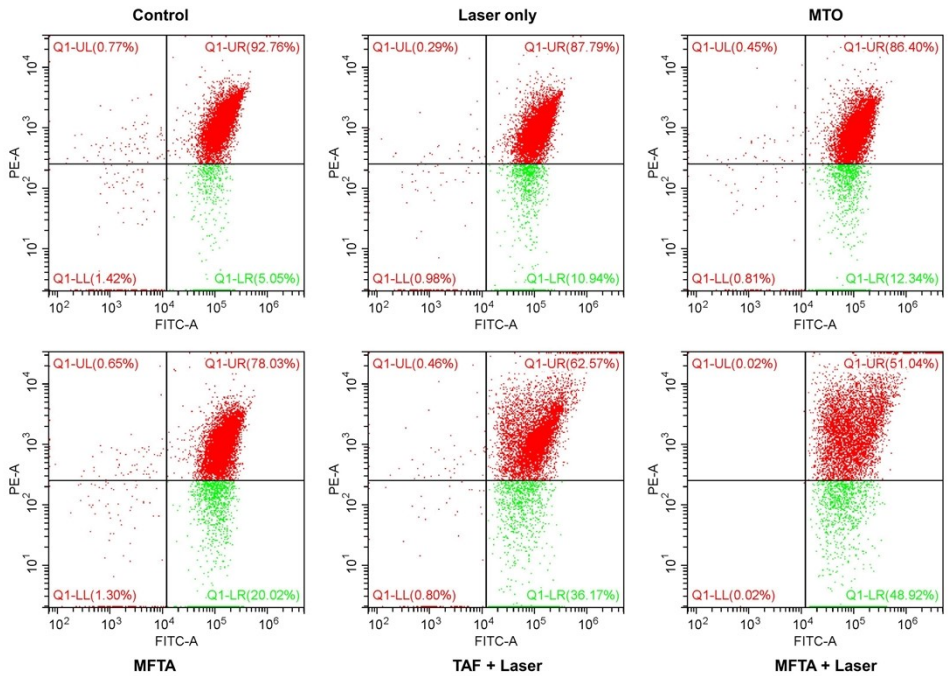

54

55 **Figure S9.** FCM analysis of JC-1 in 4T1 cells after various treatments.

56

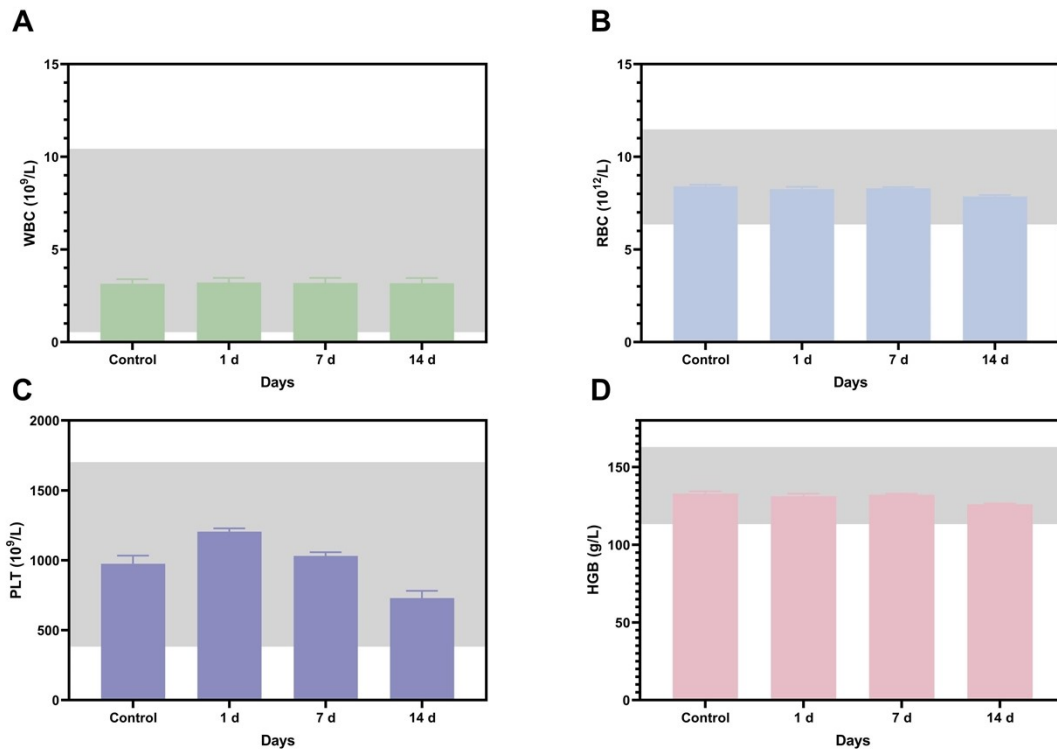

57

58 **Figure S10.** Blood biochemistry and blood routine indices of mice.

59

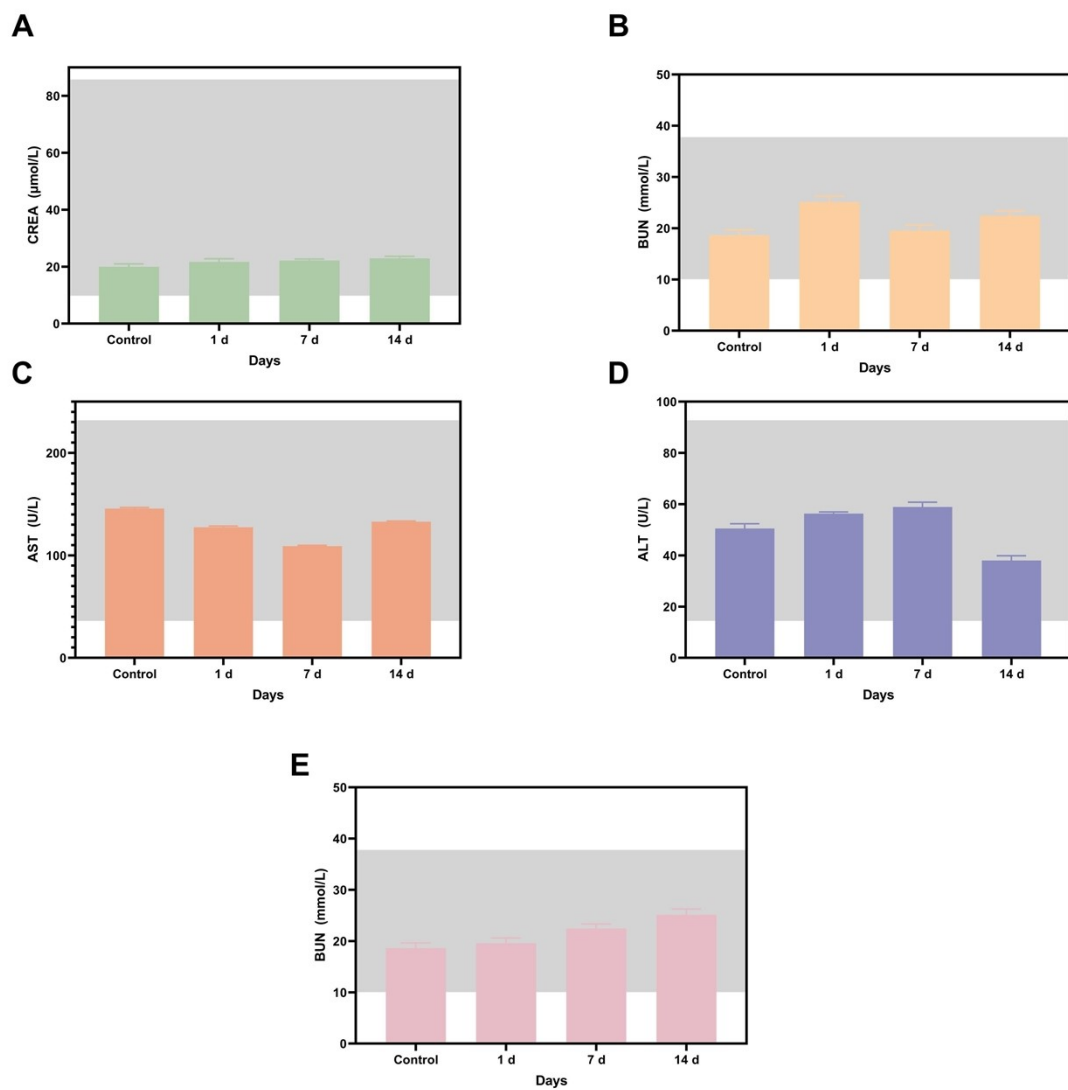

60

61 **Figure S11.** Liver and renal function detection of mice.

62

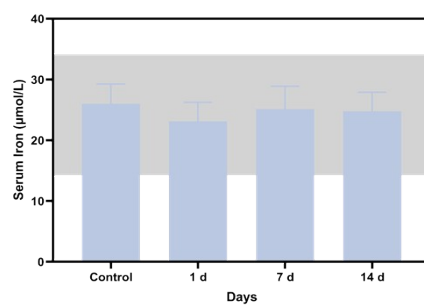

63



64 **Figure S12.** Serum iron detection of mice.

65

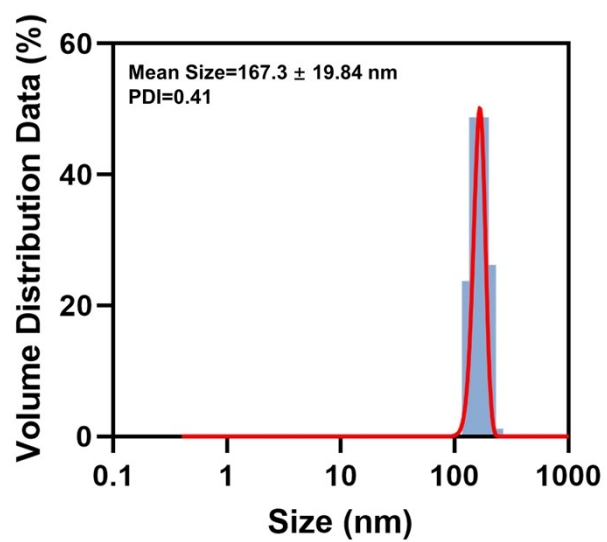

66

67 **Figure S13.** DLS size distribution and Gaussian fitting analysis of MFTA .

68

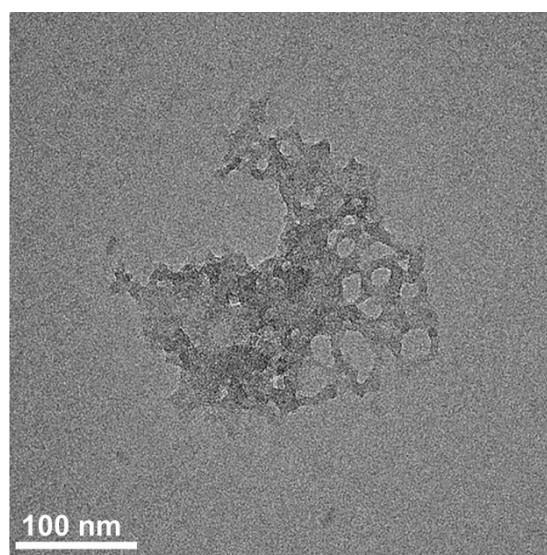

69

70 **Figure S14.** TEM image of MFTA at a low concentration of 0.05 mg/mL.

71

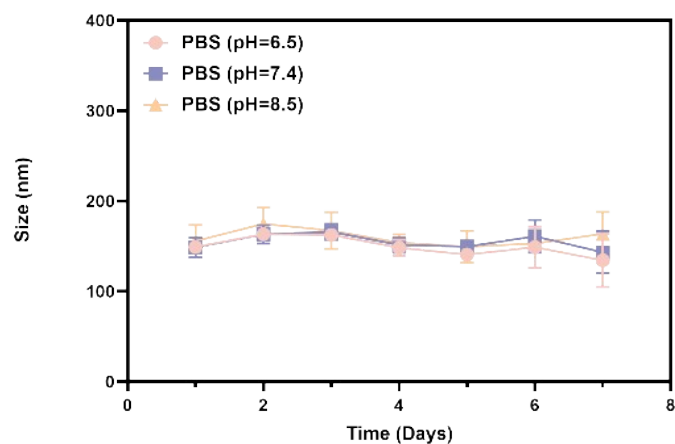

72

73 **Figure S15.** The DLS size of MFTA within 7 days in PBS buffers of different pH.

74

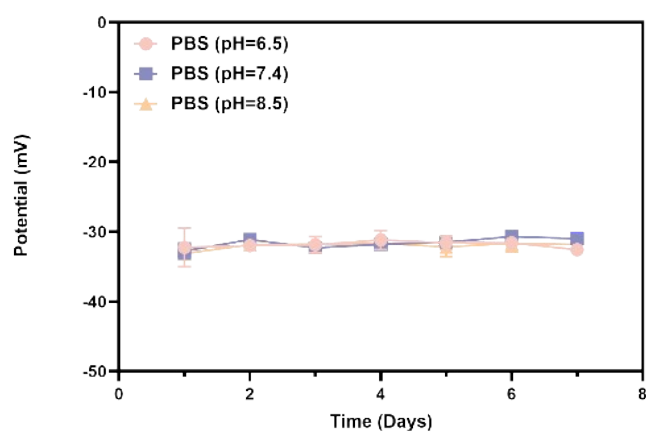

75

76 **Figure S16.** The zeta potential of MFTA within 7 days in PBS buffers of different pH.

77

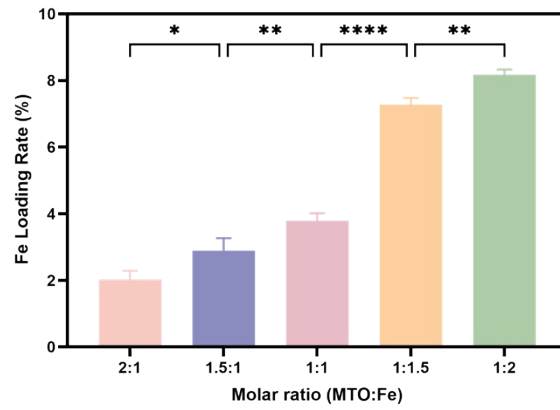

78

79 **Figure S17.** Fe loading rate of MFTA in different molar ratio (\* $p < 0.05$ , \*\* $p < 0.01$ ,  
 80 \*\*\*\* $p < 0.0001$ ).

81

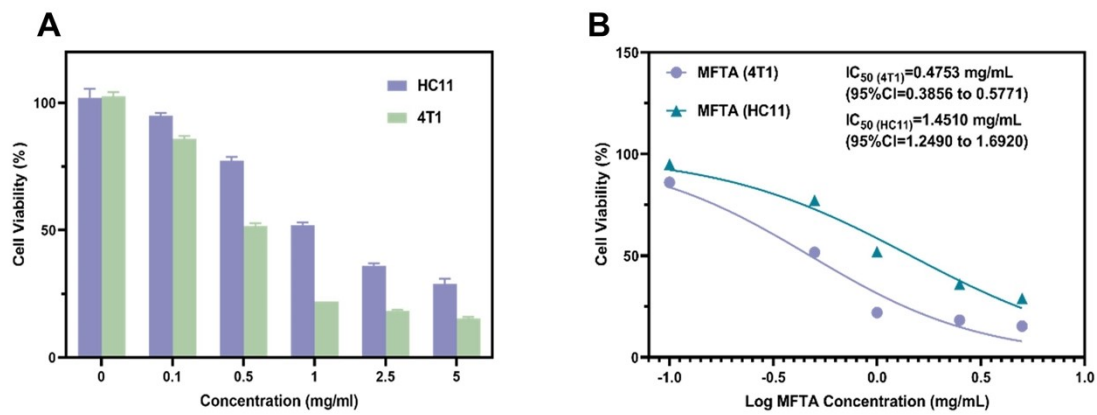

82

83 **Figure S18.** CCK-8 test of 4T1 and HC11 cells treated with MFTA.

84

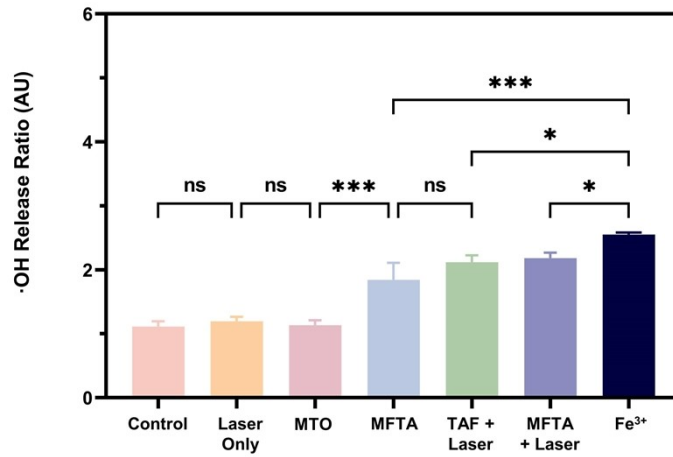

85

86 **Figure S19.** ·OH production test of various groups (\* $p < 0.05$ , \*\*\* $p < 0.001$ ).

87

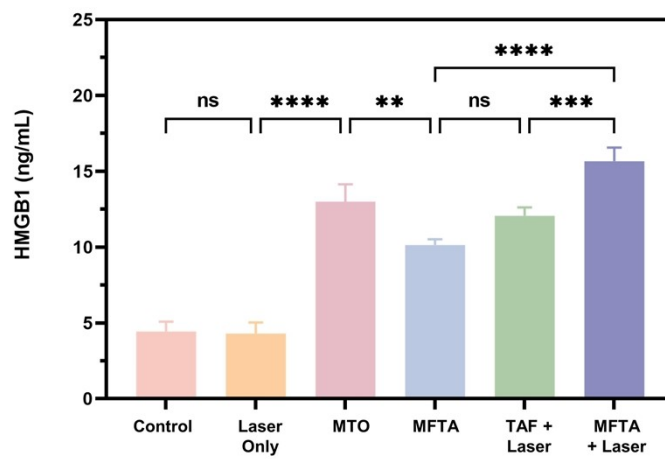

88

89 **Figure S20.** Elisa test of HMGB1 release of various groups (\*\* $p < 0.01$ , \*\*\* $p < 0.001$ ,

90 \*\*\*\* $p < 0.0001$ ).

91

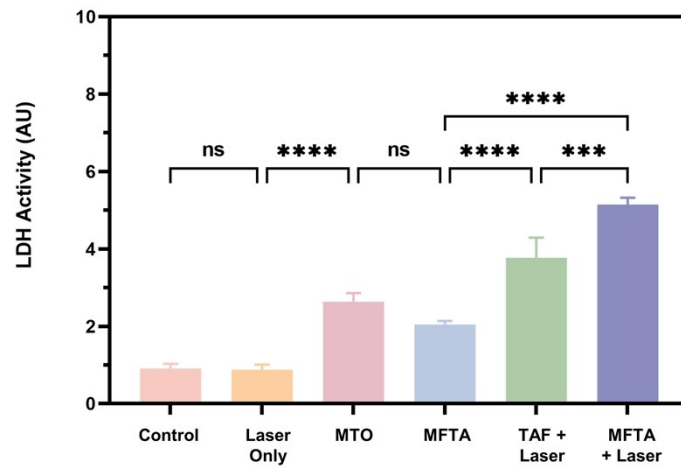

92

93 **Figure S21.** LDH release test of various groups (\*\*p < 0.001, \*\*\*\*p < 0.0001).

94

95
